# Supplementary material
Source: MDPI journal article supplement (https://www.mdpi.com/2071-1050/15/16/12132)
Supplement: s1 [file s1]

**Table.** Questionnaire concerning healthy lifestyle and healthy food choice

|                                                                                |   |   |   |   |   |
|--------------------------------------------------------------------------------|---|---|---|---|---|
| 1. How do you assess your commitment to a healthy lifestyle?                   |   |   |   |   |   |
| Commitment level                                                               | 1 | 2 | 3 | 4 | 5 |
| 2. How do you assess your commitment to healthy food choice?                   |   |   |   |   |   |
| Commitment level                                                               | 1 | 2 | 3 | 4 | 5 |
| 3. To what extent do you follow the basics of a healthy lifestyle?             |   |   |   |   |   |
| Factors:                                                                       | 1 | 2 | 3 | 4 | 5 |
| - eating healthy diet                                                          |   |   |   |   |   |
| - practicing physical fitness                                                  |   |   |   |   |   |
| - eating breakfast everyday                                                    |   |   |   |   |   |
| - don't using stimulants                                                       |   |   |   |   |   |
| - sleeping eight hours everyday                                                |   |   |   |   |   |
| - avoiding passive leisure time                                                |   |   |   |   |   |
| 4. To what extent are you involved in healthy food choice?                     |   |   |   |   |   |
| Factors:                                                                       | 1 | 2 | 3 | 4 | 5 |
| - checking the composition of food products                                    |   |   |   |   |   |
| - paying attention to food certification                                       |   |   |   |   |   |
| - checking expiration date of food products                                    |   |   |   |   |   |
| - choosing organic food products                                               |   |   |   |   |   |
| - checking the origin of food products                                         |   |   |   |   |   |
| - following the food pyramid guidelines                                        |   |   |   |   |   |
| 5. To what extent do barriers prevent you from practicing a healthy lifestyle? |   |   |   |   |   |
| Factors:                                                                       | 1 | 2 | 3 | 4 | 5 |
| - lack of time                                                                 |   |   |   |   |   |
| - lack of healthy food offerings in school/college canteens                    |   |   |   |   |   |
| - lack of healthy life style knowledge                                         |   |   |   |   |   |
| - lack of motivations                                                          |   |   |   |   |   |
| - lack of food preparation skills                                              |   |   |   |   |   |
| - I don't like healthy meals                                                   |   |   |   |   |   |
| - lack of money                                                                |   |   |   |   |   |
